# Supplementary material for: The peptidoglycan and biofilm matrix of Staphylococcus epidermidis undergo structural changes when exposed to human platelets
Source: PLoS One. 2019 Jan 25;14(1):e0211132. doi: 10.1371/journal.pone.0211132 (PMC6347161; doi:10.1371/journal.pone.0211132)
Supplement: S3 Table — For visualization of WGA-OG488, SYPRO-Ruby and DAPI staining, excitation lasers of 488 nm, 405 nm and 405 nm were used, respectively. For the TSBg samples, emission bands of 505–555 nm for WGA-OG488, 555–700 nm for SYPRO-Ruby, and 410–505 nm for DAPI were acquired using the GaAsP detectors and a Plan-Apochromat 40x NA 1.4 oil objective. For the PC samples, emission bands of 485–560 nm for WGA-OG488, 554–700 nm for SYPRO-Ruby, and 400–530 nm for DAPI were acquired using the high resolution Airyscan detector and a Plan-Apochromat 63x NA 1.4 oil objective. (DOCX) [file pone.0211132.s004.docx]

**The peptidoglycan and biofilm matrix of *Staphylococcus epidermidis* undergo structural changes when exposed to human platelets**

Maria Loza-Correa1,2, Juan A Ayala3, Iris Perelman1, Keith Hubbard4, Miloslav Kalab4, Qi-Long Yi1, Mariam Taha1, Miguel A. de Pedro3, and Sandra Ramirez-Arcos1,2*

1Centre for Innovation, Canadian Blood Services, Ottawa, Canada

2Department of Biochemistry, Microbiology and Immunology, University of Ottawa, Ottawa, Canada

3Centro de Biología Molecular Severo Ochoa, Universidad Autónoma de Madrid, Madrid, Spain

4Agriculture and Agri-food Canada, Ottawa, ON, Canada

**S3 Table. CLSM signal intensities**.

|  | **Arithmetic Mean Intensity** | | | | | |
| --- | --- | --- | --- | --- | --- | --- |
|  | **TSBg** | | | **PCs** | | |
|  | **ST10002** | **AZ39** | **Control** | **ST10002** | **AZ39** | **Control** |
| WGA-OG488 | 3017.16 | 2073.87 | 344.38 | 1006.67 | 589.53 | 137.68 |
| SYPRO-Ruby | 12780.85 | 9912.85 | 1285.97 | 434.55 | 277.99 | 63.26 |
| DAPI | 9530.84 | 5244.78 | 2629.17 | 1201.10 | 521.79 | 20.68 |
